# Supplementary material for: Highly sensitive and selective fluorescent probe for Fe3+ and hazardous phenol compounds based on a water-stable Zn-based metal–organic framework in aqueous media
Source: Royal Society of Chemistry journal article supplement (doi:10.1039/c7ra08427g), 2017-01-01
Supplement: c7ra08427g1.pdf [file c7ra08427g1.pdf]

# **Highly sensitive and selective fluorescent probe for Fe<sup>3+</sup> and phenol hazardous compounds based on a water-stable Zn-Based metal-organic framework in aqueous media**

Huijun Li, Yaling He, Qingqing Li, Shaojie Li, Zhihao Yi, Zhouqing Xu,\* Yuan Wang\*

*College of Chemistry and Chemical Engineering, Henan Polytechnic University, Jiaozuo, Henan 454000, China*

Corresponding author. E-mail: zhqxu@hpu.edu.cn. Wangyuan08@hpu.edu.cn.

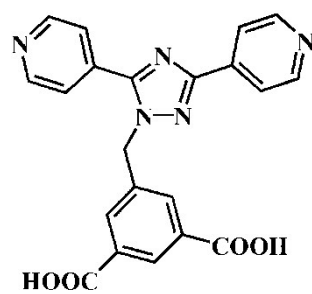

**Scheme S1.** The ligand used in this article.

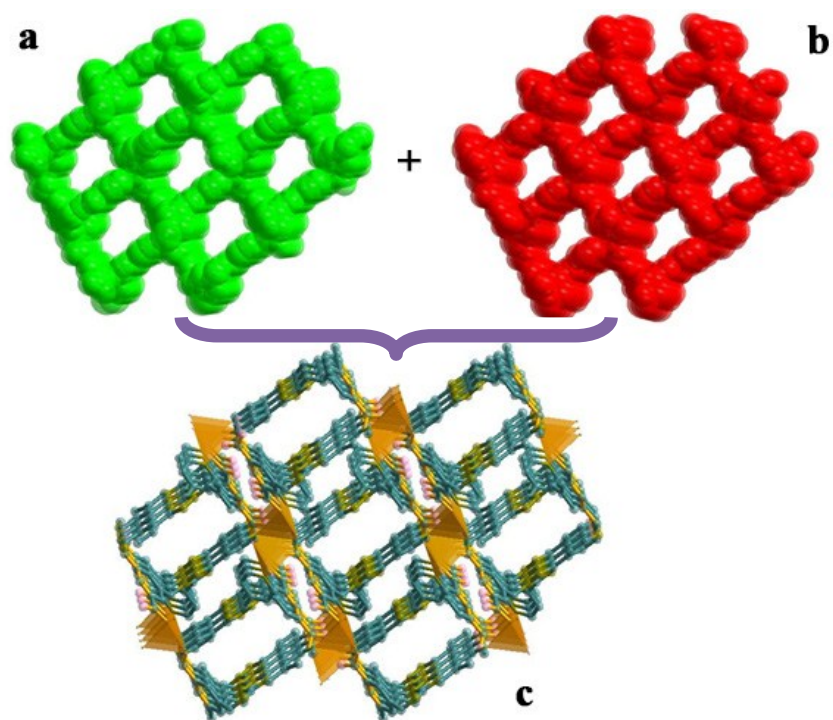

**Figure S1.** The two-fold interpenetrating network (c) constructed by mutual interpenetration of two three-dimensional frameworks (a and b).

**Table S1** Crystal data and structure refinement details of complex **1**<sup>a</sup>.

| Complex                                  | HPU-1                                                                     |
|------------------------------------------|---------------------------------------------------------------------------|
| Formula                                  | C <sub>22.50</sub> H <sub>20.5</sub> N <sub>5.5</sub> O <sub>6.5</sub> Zn |
| formula weight, fw                       | 537.31                                                                    |
| Temperature, <i>T</i> [K]                | 293(2)                                                                    |
| crystal system                           | <i>monoclinic</i>                                                         |
| space group                              | <i>P 21/n</i>                                                             |
| a [Å]                                    | 12.208(3)                                                                 |
| b [Å]                                    | 13.002(3)                                                                 |
| c [Å]                                    | 16.101(4)                                                                 |
| α [°]                                    | 90                                                                        |
| β [°]                                    | 104.197(4)                                                                |
| γ [°]                                    | 90                                                                        |
| V [Å <sup>3</sup> ]                      | 2477.8(10)                                                                |
| Z                                        | 4                                                                         |
| ρ [g cm <sup>-3</sup> ]                  | 1.440                                                                     |
| μ [mm <sup>-1</sup> ]                    | 1.041                                                                     |
| θ range                                  | 2.45-20.78                                                                |
| F(000)                                   | 1104.0                                                                    |
| goodness-of-fit, GOF                     | 1.008                                                                     |
| R <sub>1</sub> <sup>a</sup> [I > 2σ (I)] | 0.0425                                                                    |
| wR <sub>2</sub> <sup>b</sup> (all data)  | 0.1129                                                                    |

$${}^a R_1 = \frac{\sum (|F_o| - |F_c|)}{\sum |F_o|}, \quad {}^b wR_2 = \frac{[\sum w(|F_o|^2 - |F_c|^2)^2 / \sum w|F_o|^2]^2}{\sum w|F_o|^2}]^{1/2}.$$

**Table S2** Selected Bond Distances (Å) and Angles (°) for Compound **1**

| <b>1</b>            |            |                     |            |
|---------------------|------------|---------------------|------------|
| Zn(1)-O(4)          | 1.9213(18) | Zn(1)-O(1)#1        | 1.9708(19) |
| Zn(1)-N(5)#2        | 2.0269(19) | Zn(1)-N(1)#3        | 2.056(2)   |
| O(4)-Zn(1)-O(1)#1   | 113.31(8)  | O(4)-Zn(1)-N(5)#2   | 122.54(8)  |
| O(1)#1-Zn(1)-N(5)#2 | 105.56(8)  | O(4)-Zn(1)-N(1)#3   | 112.72(8)  |
| O(1)#1-Zn(1)-N(1)#3 | 95.28(8)   | N(5)#2-Zn(1)-N(1)#3 | 103.64(8)  |

Symmetry transformations used to generate equivalent atoms for **1**: #1 x+1/2, -y-1/2, z+1/2; #2 x-1/2, -y-1/2, z+1/2; #3 x, y-1, z.

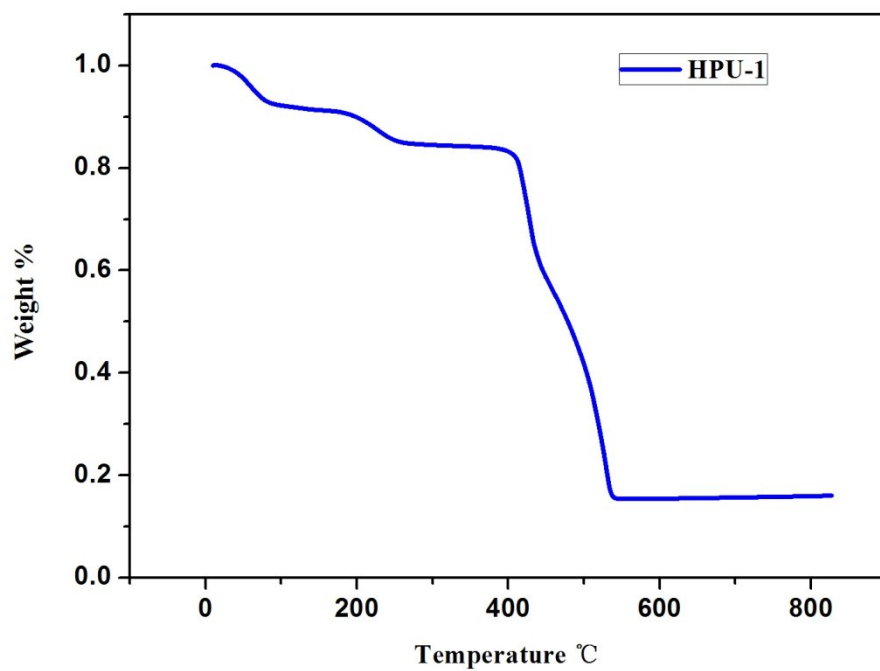

Figure S2. The TG curve of HPU-1.

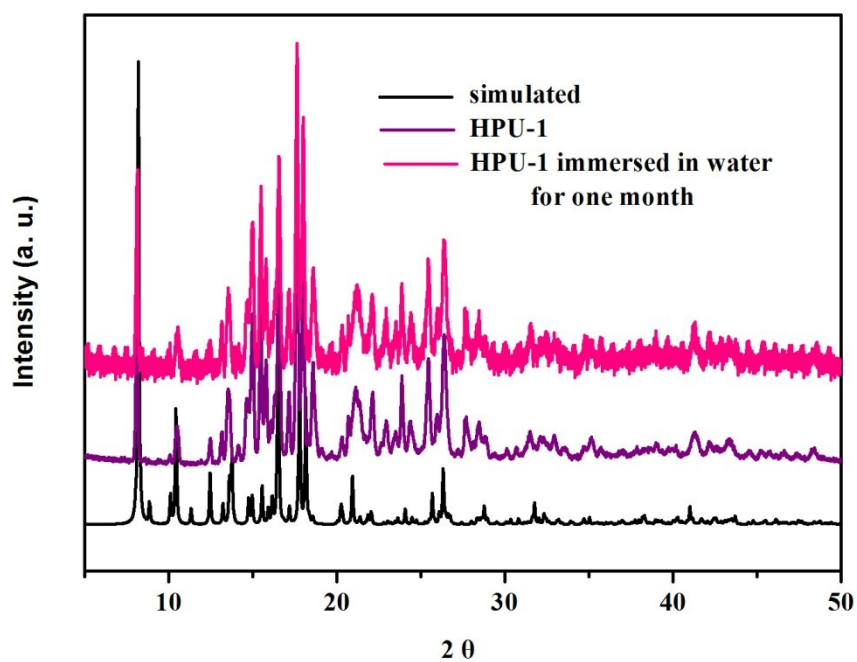

Figure S3. PXRD patterns of the simulated, as-synthesized of HPU-1 and immersed in water for one month.

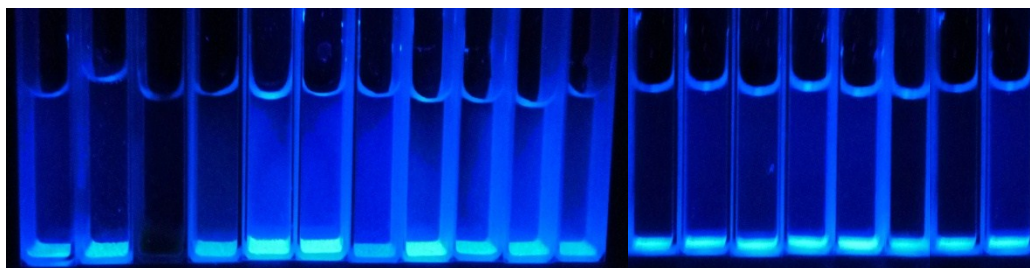

**Figure S4.** The corresponding photographs for **HPU-1** in the presence of various 0.01 mol/L aqueous of  $M^{n+}$  under UV-light irradiation at 350 nm. From the left to right: **HPU-1**,  $Cr^{3+}$ ,  $Fe^{3+}$ ,  $Ag^+$ ,  $Al^{3+}$ ,  $Ba^{2+}$ ,  $Ca^{2+}$ ,  $Cd^{2+}$ ,  $Co^{2+}$ ,  $Cu^{2+}$ ,  $K^+$ ,  $Li^+$ ,  $Mg^{2+}$ ,  $Mn^{2+}$ ,  $Na^+$ ,  $Ni^{2+}$ ,  $Pb^{2+}$ ,  $Eu^{3+}$ ,  $Tb^{3+}$ .

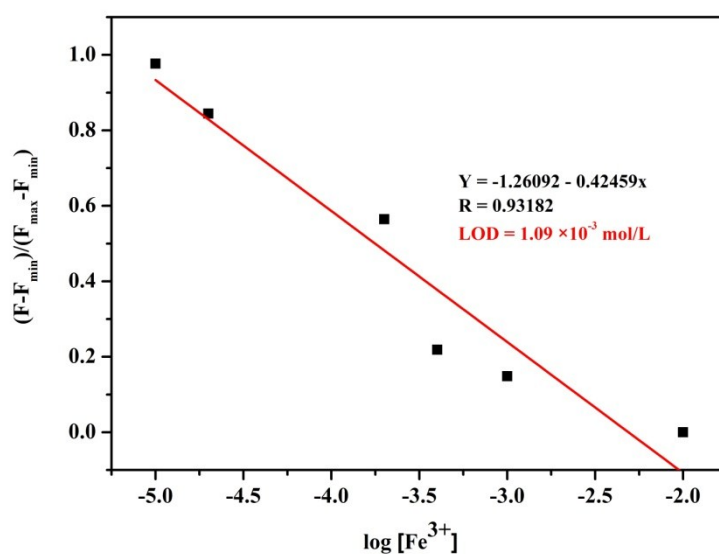

**Figure S5.** The normalized response of fluorescence calibration value at 430 nm as a function of  $Fe^{3+}$  concentration.

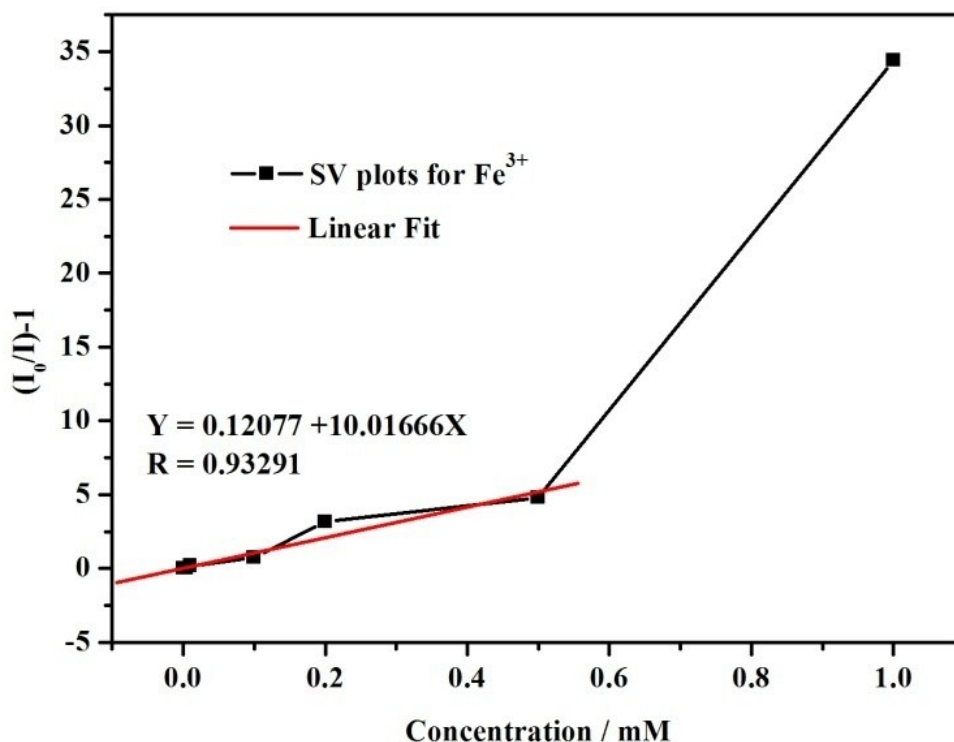

**Figure S6.** The fluorescence intensities at 430 nm as a function of Fe<sup>3+</sup> concentration.

Table S3 The comparison of coefficients of quenching

| Ksv values (M <sup>-1</sup> ) | Complexes                                                                                                                                            |
|-------------------------------|------------------------------------------------------------------------------------------------------------------------------------------------------|
| $4.1 \times 10^3$             | EuL <sub>3</sub> (L = 4'-(4-carboxyphenyl)-2,2': 6',2''-terpyridine) <sup>1</sup>                                                                    |
| $7.8 \times 10^3$             | Pb <sub>3</sub> O <sub>2</sub> L (H <sub>2</sub> L = 4-(1H-tetrazol-5-yl)phenol) <sup>2</sup>                                                        |
| $3.543 \times 10^3$           | {[Tb <sub>4</sub> (OH) <sub>4</sub> (DSOA) <sub>2</sub> (H <sub>2</sub> O) <sub>8</sub> ](H <sub>2</sub> O) <sub>8</sub> } <sub>n</sub> <sup>3</sup> |
| $2.09 \times 10^4$            | Eu-HODA (HODA = 2,2',3,3'-Oxidiphthalic acid) <sup>4</sup>                                                                                           |
| $1.0 \times 10^4$             | This work                                                                                                                                            |

1 Zheng, M.; Tan, H.-Q.; Xie, Z.-G.; Zhang, L.-G.; Jing, X.-B. and Sun, Z.-C. *ACS Appl. Mater. Interfaces.*, **2013**, *5*, 1078–1083.

2 Luo, X.; Zhang, X.; Duan, Y.-L.; Wang, X.-L.; Zhao, J.-M. *Dalton Trans.*, **2017**, *46*, 6303-6311.

3 Dong, X.-Y.; Wang, R.; Wang, J.-Z.; Zang, S.-Q.; Mark, T. C. W. *J. Mater. Chem. A.*, **2015**, *3*, 641-647.

4 Wang, J.; Jiang, M.; Yan, L.; Peng, R.; Huangfu, M. J.; Guo, X.-X.; Li, Y.; Wu, P.-Y. *Inorg. Chem.*, **2016**, *55*, 12660–12668.

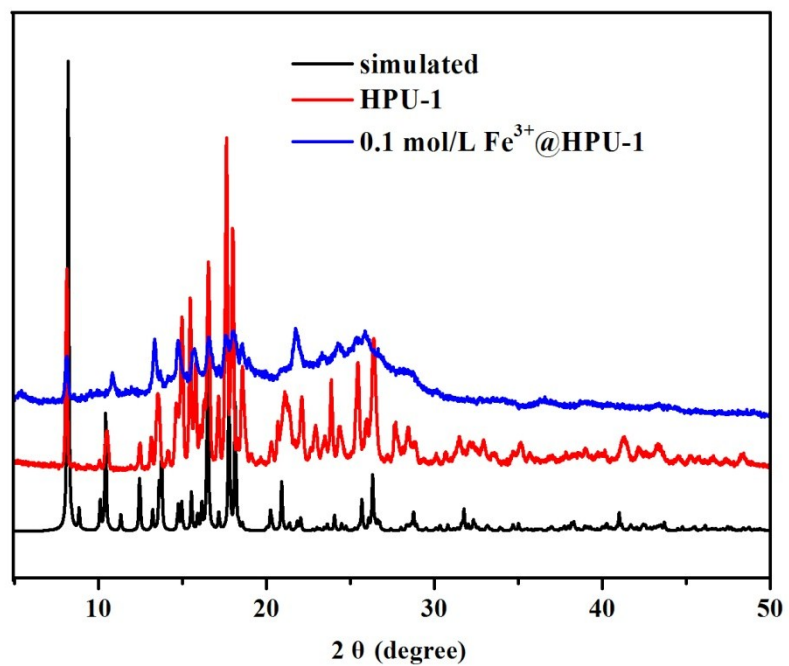

**Figure S7.** PXRD patterns of simulated **HPU-1**, experimental **HPU-1** and 0.1 mol/L Fe<sup>3+</sup>@ **HPU-1**.

**Table S4** The ICP results of time-dependent filtrate after ion-exchanging

| Immersion time in Fe <sup>3+</sup> aqueous solution | Zn <sup>2+</sup> ion amount (ppm) filtrate after Fe <sup>3+</sup> exchanging observed in ICP results | Fe <sup>3+</sup> ion amount (ppm) filtrate after Fe <sup>3+</sup> exchanging observed in ICP results |
|-----------------------------------------------------|------------------------------------------------------------------------------------------------------|------------------------------------------------------------------------------------------------------|
| 30 min                                              | 241.8                                                                                                | 796.4                                                                                                |
| 1 h                                                 | 330.6                                                                                                | 788.1                                                                                                |
| 2 h                                                 | 426.7                                                                                                | 772.4                                                                                                |
| 5 h                                                 | 510.0                                                                                                | 764.2                                                                                                |
| 16 h                                                | 638.1                                                                                                | 692.5                                                                                                |
| 24 h                                                | 740.1                                                                                                | 659.0                                                                                                |

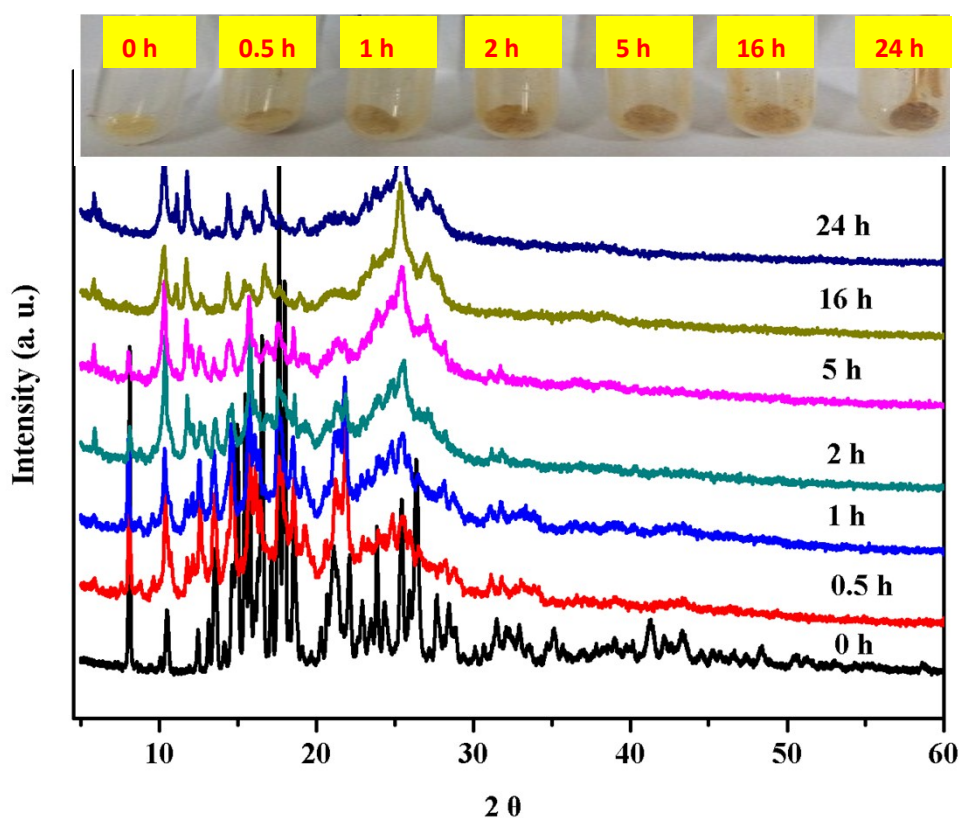

**Figure S8.** The PXRD patterns of Time-dependent products.



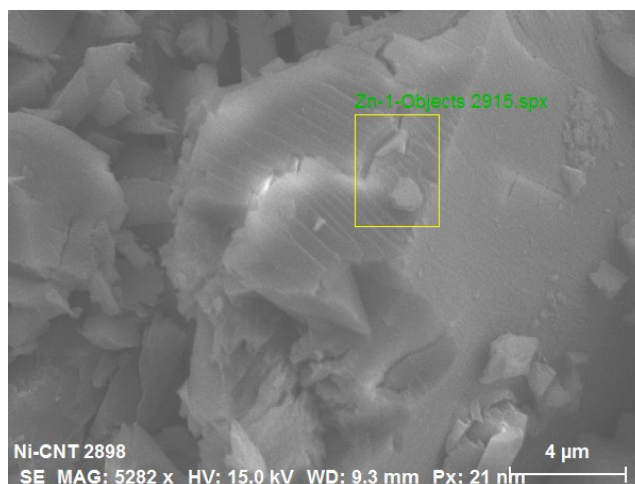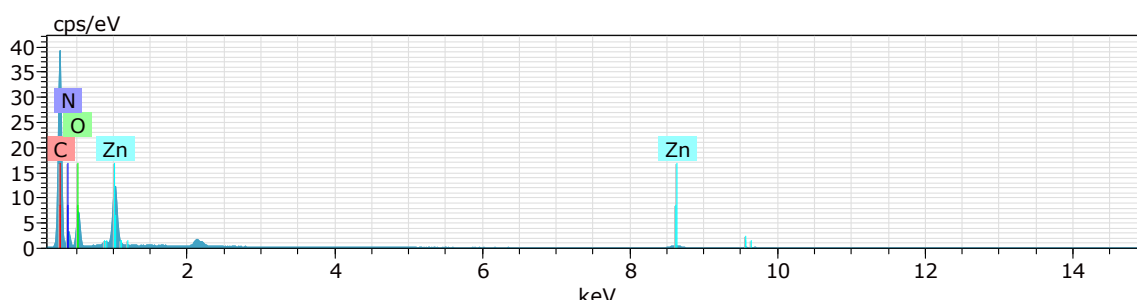

El AN Series un. C norm. C Atom. C Error (1 Sigma)  
 [wt.%) [wt.%) [at.%) [wt.%)

|    |    |          | un.    | C norm. | C Atom. | C Error (1 Sigma) |
|----|----|----------|--------|---------|---------|-------------------|
|    |    |          | [wt.%) | [wt.%)  | [at.%)  | [wt.%)            |
| C  | 6  | K-series | 67.38  | 50.65   | 60.38   | 7.71              |
| O  | 8  | K-series | 27.35  | 20.56   | 18.40   | 3.59              |
| N  | 7  | K-series | 24.71  | 18.58   | 18.99   | 3.63              |
| Zn | 30 | K-series | 13.59  | 10.22   | 2.24    | 0.54              |

**Figure S9.** SEM and EDS results of **HPU-1**.

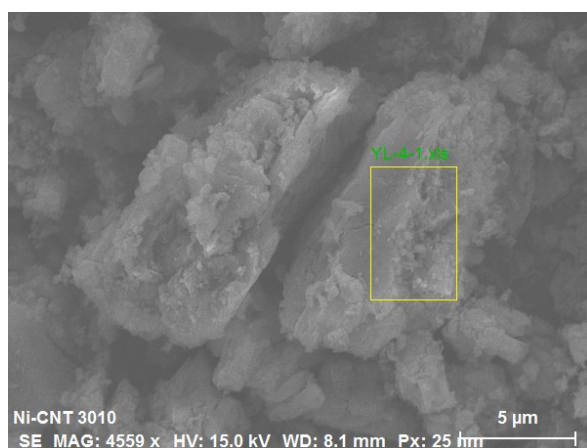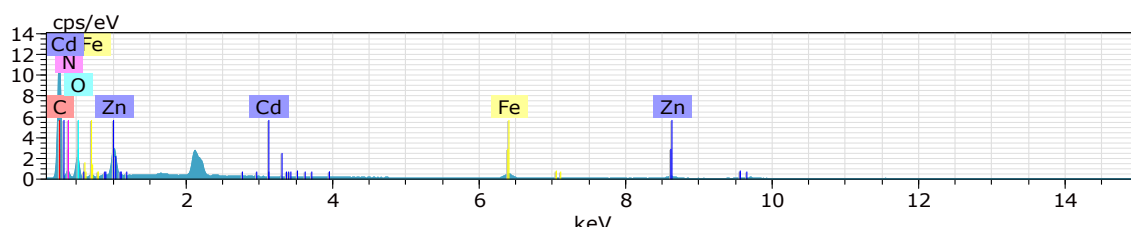

El AN Series un. C norm. C Atom. C Error (1 Sigma)  
 [wt.%) [wt.%) [at.%) [wt.%)

|    |    |          |       |       |       |      |
|----|----|----------|-------|-------|-------|------|
| C  | 6  | K-series | 29.34 | 52.63 | 67.22 | 3.50 |
| O  | 8  | K-series | 8.39  | 15.06 | 14.44 | 1.22 |
| Zn | 30 | K-series | 7.70  | 13.81 | 3.24  | 0.33 |
| N  | 7  | K-series | 6.81  | 12.22 | 13.38 | 1.20 |
| Fe | 26 | K-series | 3.48  | 6.24  | 1.71  | 0.14 |
| Cd | 48 | L-series | 0.00  | 0.00  | 0.00  | 0.00 |

**Figure S10.** SEM and EDS results of Fe<sup>3+</sup>@HPU-1.

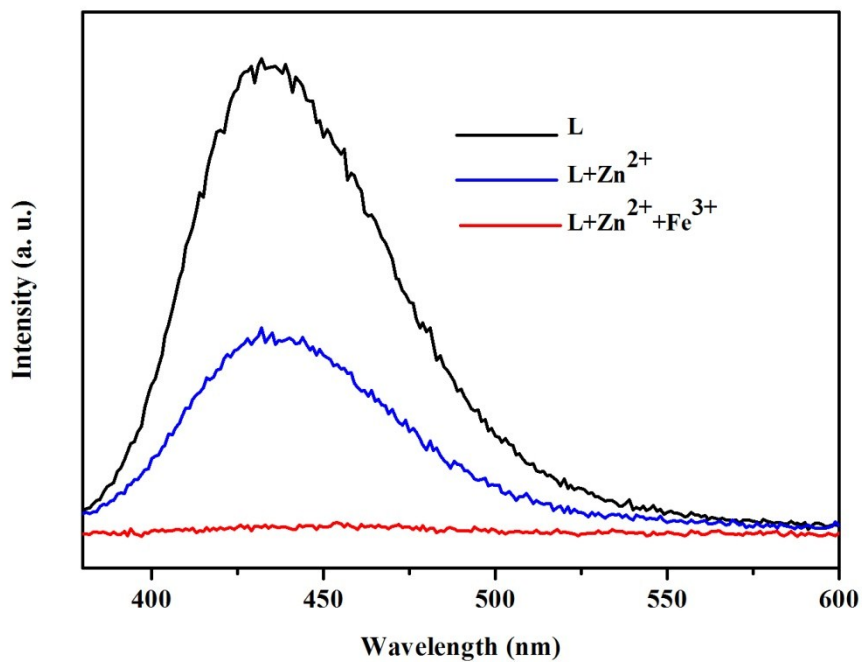

**Figure S11.** Fluorescence spectra of DPTMIA (2 mg) towards aqueous solution of 0.01 mol/L  $\text{Zn}^{2+}$ ,  $\text{Zn}^{2+} + \text{Fe}^{3+}$  and comparison with free DPTMIA.

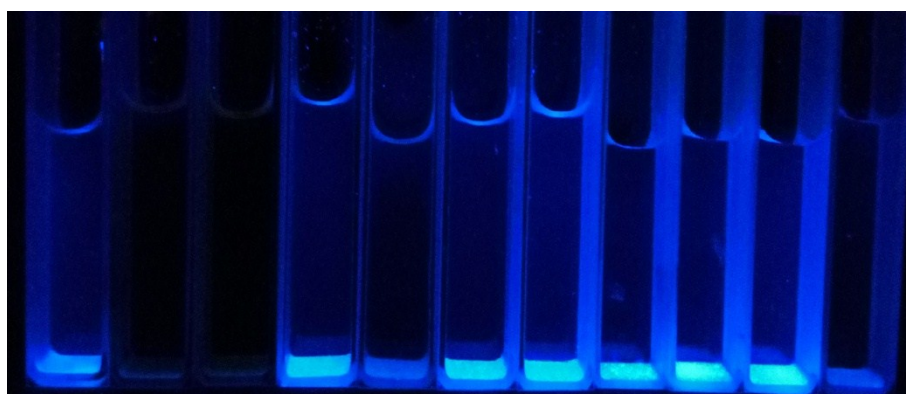

**Figure S12.** The corresponding photographs for **HPU-1** in the presence of various 0.01 mol/L aqueous of organic analytes under UV-light irradiation at 350 nm. From the left to right: **HPU-1**, 4-NP, 2, 4-DNP, 1, 3-DNB, 3-NP, 2, 4-DNT, 4-NT, 1, 4-DMB, MB, 1, 3, 5-TMB, NB.

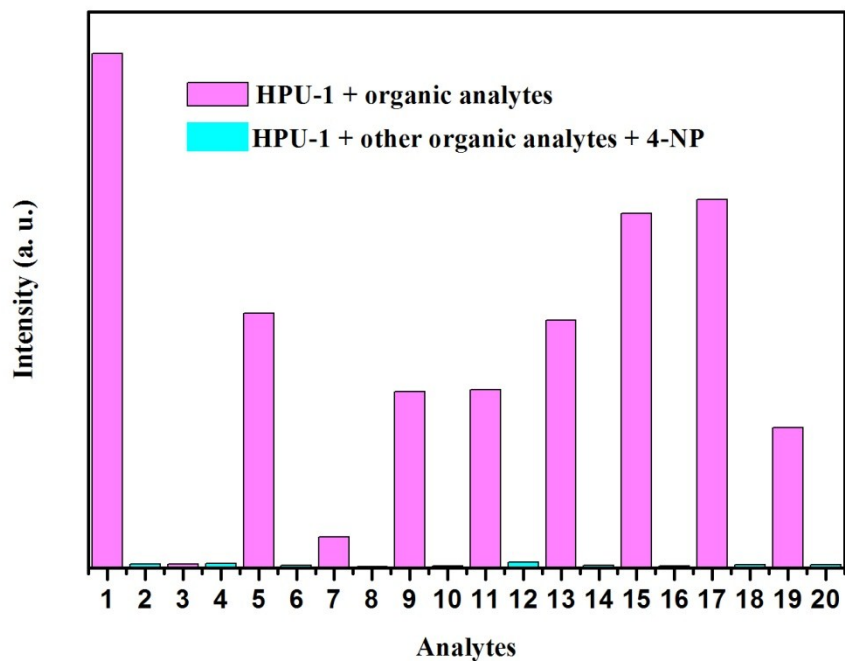

**Figure S13.** Fluorescence responses of **HPU-1** (2 mg) in the absence and presence of various organic analytes. Pink bars: a free sensor or a sensor treated with the marked organic analytes. Blue bars: a sensor treated with the marked organic analytes followed by equivalent of 4-NP.

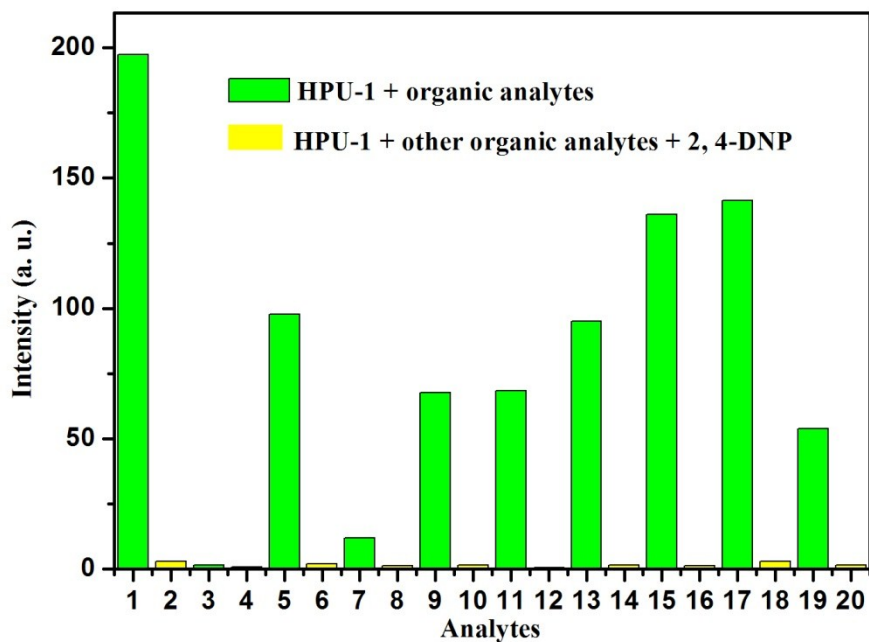

**Figure S14.** Fluorescence responses of **HPU-1** (2 mg) in the absence and presence of various organic analytes. Cyan bars: a free sensor or a sensor treated with the marked organic analytes. Yellow bars: a sensor treated with the marked organic analytes followed by equivalent of 2, 4-DNP.

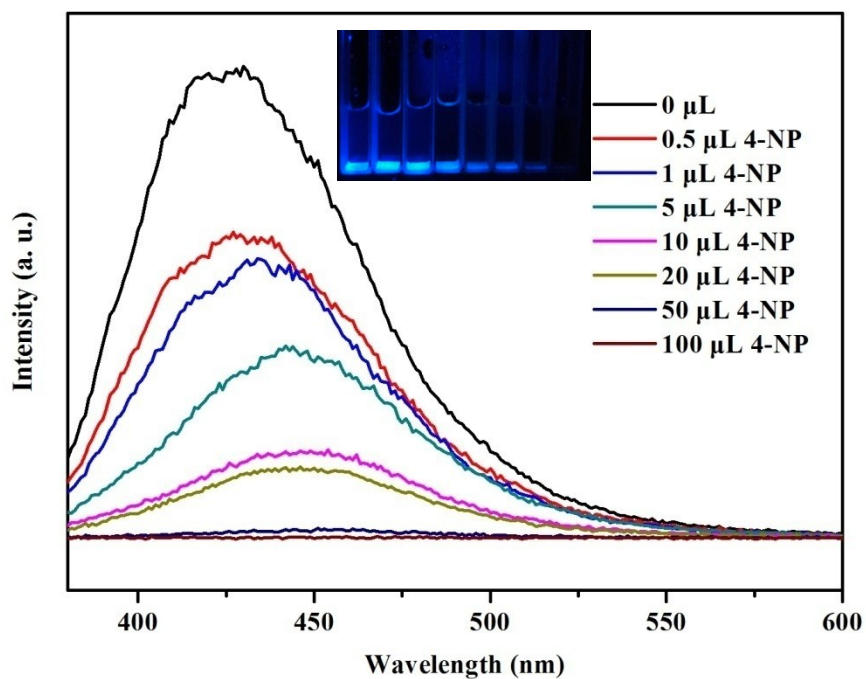

**Figure S15.** Emission spectra of **HPU-1** (2 mg) dispersed in water (2 mL) upon incremental addition of 4-NP solution (20 mM) in water. Inset: photographs of **HPU-1** (2 mg) in aqueous solutions of various concentrations of 4-NP.

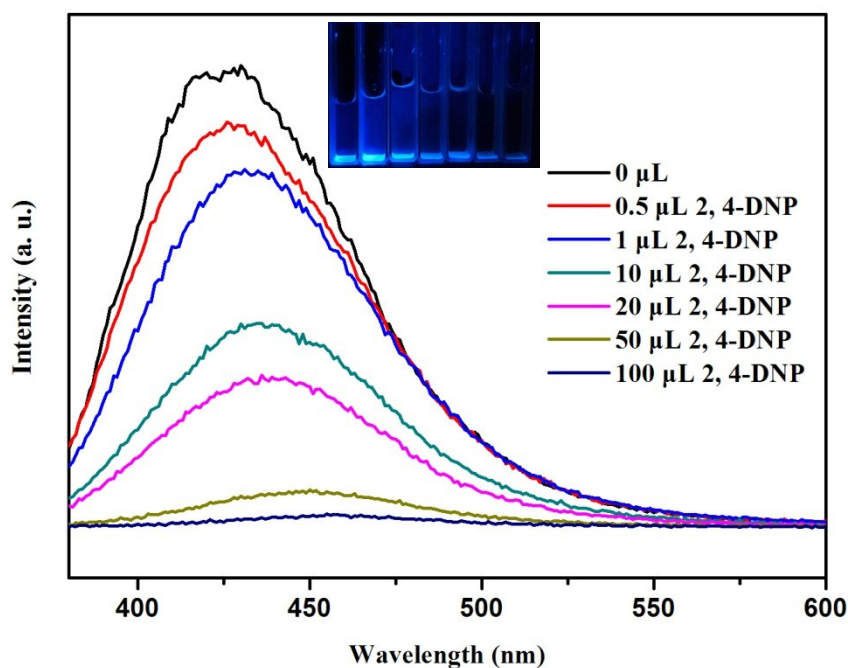

**Figure S16.** Emission spectra of **HPU-1** (2 mg) dispersed in water (2 mL) upon incremental addition of 2, 4-DNP solution (20 mM) in water. Inset: photographs of **HPU-1** (2 mg) in aqueous solutions of various concentrations of 2, 4-DNP.

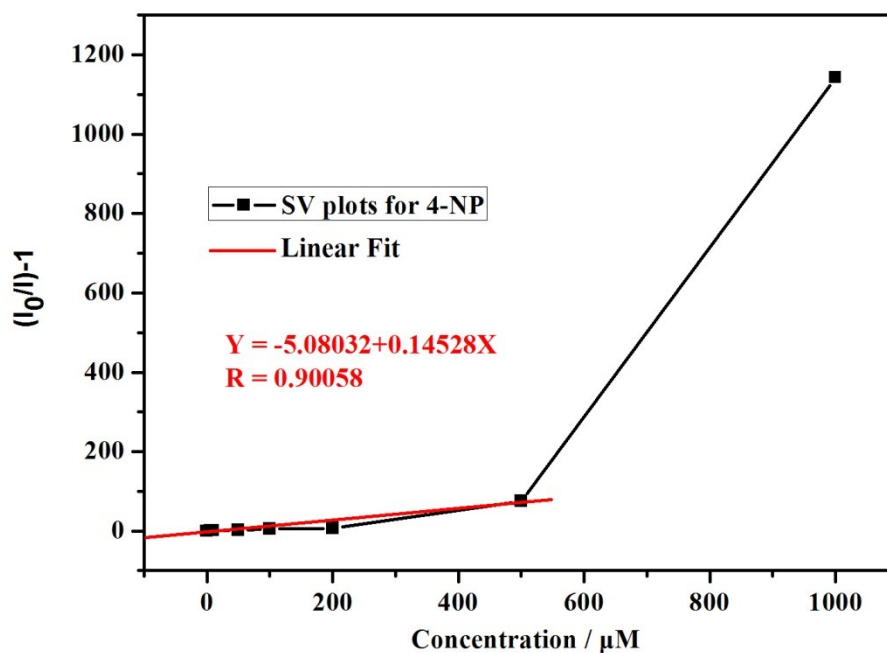

**Figure S17.** Stern-Volmer (SV) plots for 4-NP. The relative fluorescence intensity is linear with the concentration in the range of 0-500  $\mu\text{M}$ ,  $I_0/I = 0.14528[Q]-1$ .  $K_{sv} = 1.45 \times 10^5 \text{ M}^{-1}$ .

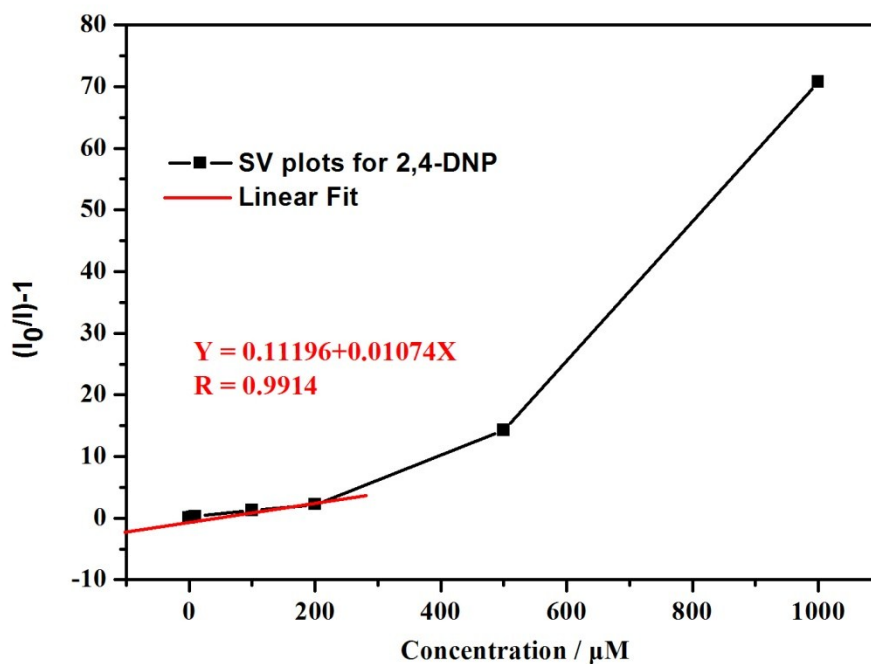

**Figure S18.** Stern-Volmer (SV) plots for 2, 4-DNP. The relative fluorescence intensity is linear with the concentration in the range of 0-200  $\mu\text{M}$ ,  $I_0/I = 0.01074[Q]-1$ .  $K_{sv} = 1.074 \times 10^4 \text{ M}^{-1}$ .

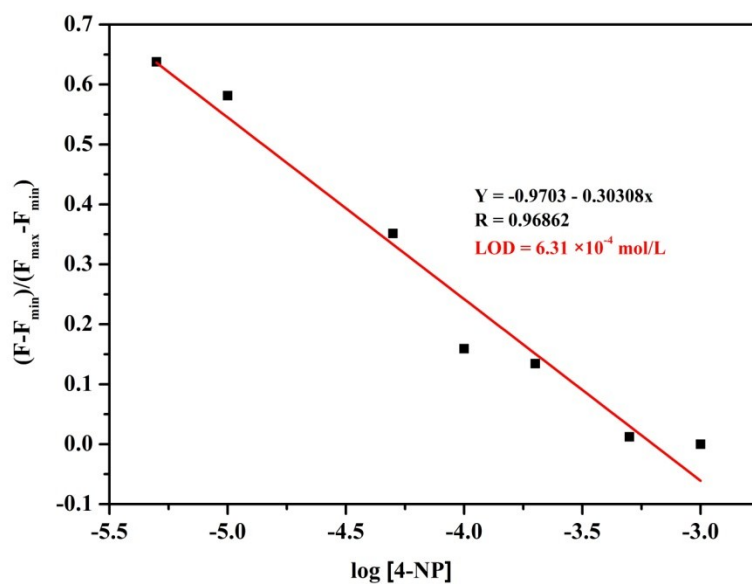

**Figure S19.** The normalized response of fluorescence calibration value at 430 nm as a function of 4-NP concentration.

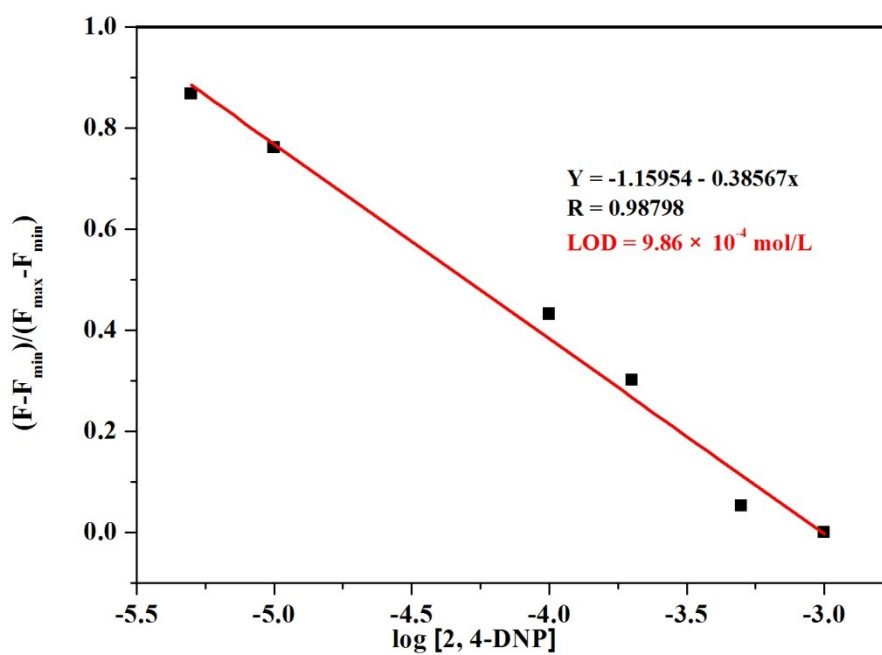

**Figure S20.** The normalized response of fluorescence calibration value at 430 nm as a function of 2, 4-DNP concentration.

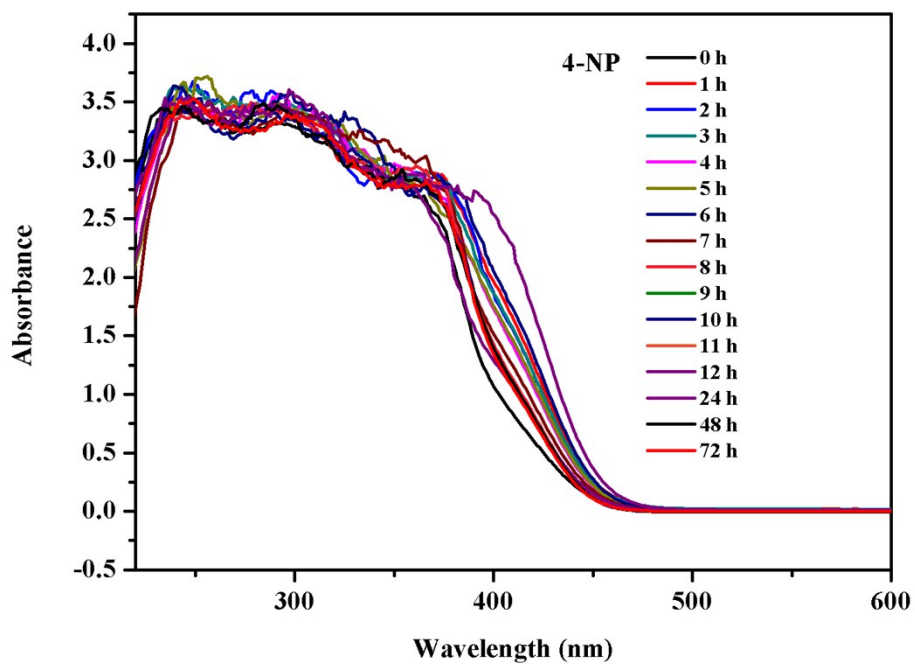

**Figure S21.** The UV-absorbance spectra of 4-NP in time-dependent filtrate.

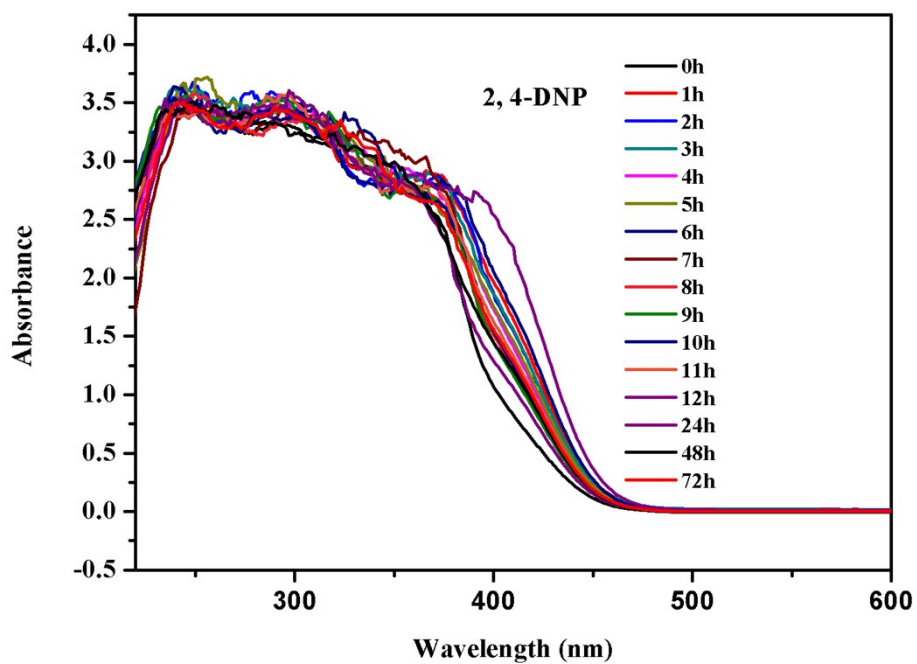

**Figure S22.** The UV-absorbance spectra of 2,4-DNP in time-dependent filtrate.



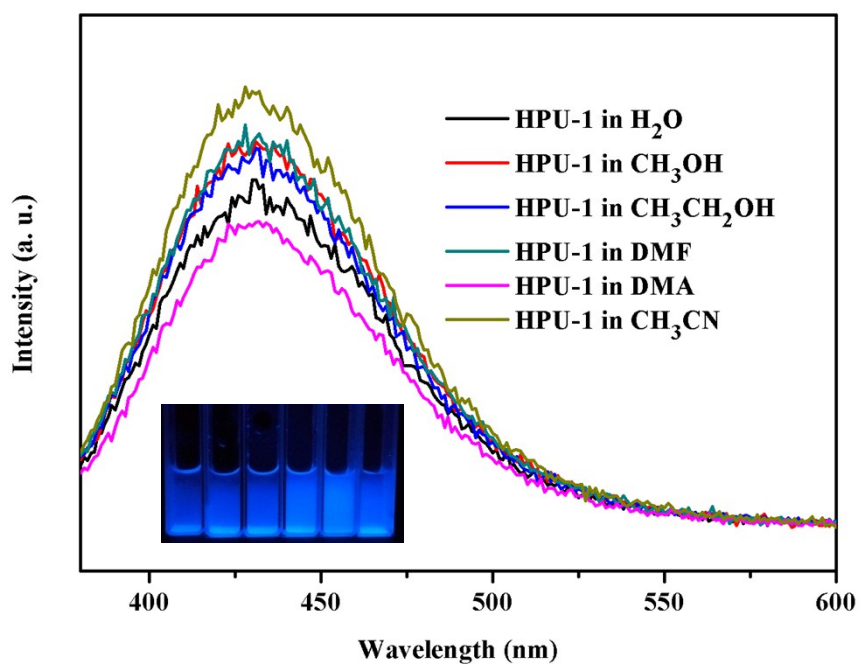

**Figure S23.** Fluorescence spectra of **HPU-1** (2 mg) in various solvents. **Inset:** photographs of **HPU-1** dispersed in various solvents. From the left to right:  $\text{H}_2\text{O}$ ,  $\text{CH}_3\text{OH}$ ,  $\text{CH}_3\text{CH}_2\text{OH}$ ,  $\text{DMF}$ ,  $\text{DMA}$ ,  $\text{CH}_3\text{CN}$ .

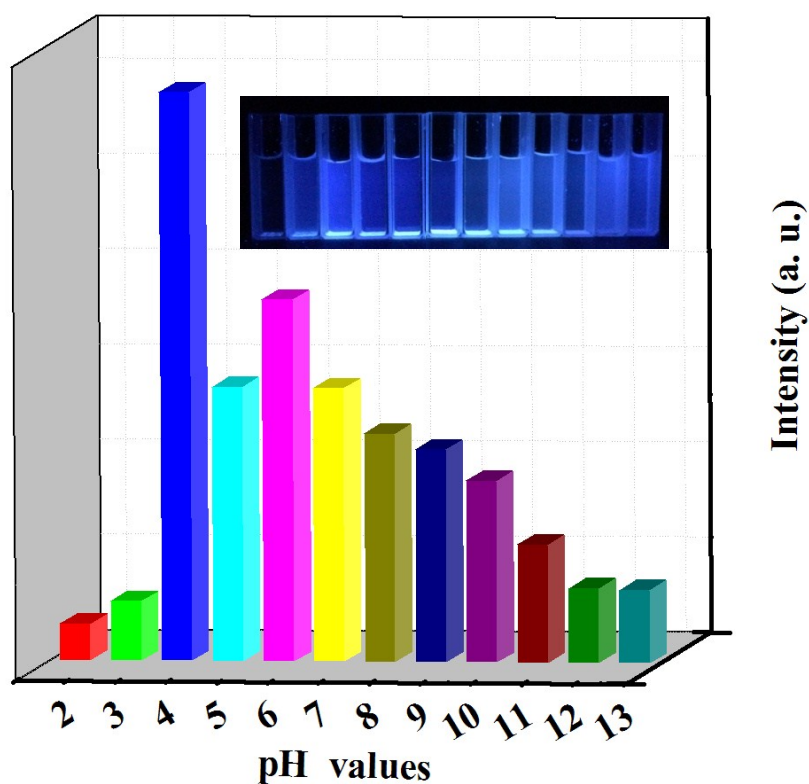

**Figure S24.** Fluorescence spectra of **HPU-1** (2 mg) in different pH values of aqueous solution (2 mL). **Inset:** photographs of **HPU-1** dispersed in different pH values of aqueous solution.
